# Supplementary material
Source: publisher site journal article supplement (https://www.dovepress.com/article/400390)
Supplement: Supplementary file 1 [file get_supplementary_file.php]

**SUPPLEMENTARY MATERIAL:**

# A nomogram for early diagnosis of community-acquired pneumonia based on bronchoalveolar lavage fluid metabolomics

Siqin Chen1*, Minhong Su2*, Wei Lei1*, Zhida Wu1, Shuhong Wu1, Jing Liu1, Xiaoyan Huang1, Guiyang Chen1, Qian Zhang1, Hua Zhong1, Fu Rong1, Xi Li1, and Qiang Xiao1.

1 Pulmonary and Critical Care Medicine, Shunde Hospital, Southern Medical University (the First People's Hospital of Shunde Foshan), Foshan, Guangdong, China;

2 Pulmonary and Critical Care Medicine, Zhujiang Hospital,Southern Medical University, Guangzhou, Guangdong, China.

*These authors contributed equally to this work

Correspondence:

Qiang Xiao; Pulmonary and Critical Care Medicine, Shunde Hospital, Southern Medical University (The First People’s Hospital of Shunde Foshan), No.1, Jiazi road, Lunjiao stree, Shunde district, Foshan, Guangdong, China 528300; Tel: +1 392 313 9158; Email: [xiaoqiang@smu.edu.cn](mailto:xiaoqiang@smu.edu.cn)

Xi Li; Pulmonary and Critical Care Medicine, Shunde Hospital, Southern Medical University (The First People’s Hospital of Shunde Foshan), No.1, Jiazi road, Lunjiao stree, Shunde district, Foshan, Guangdong, China 528300; Tel: +1 382 453 0326; Email: kamaneal@163.com

| Table S1. Assignment table of each variable | |
| --- | --- |
| Variable | Assignment |
| community-acquired pneumonia | No=0，Yes=1 |
| Dimethyldisulfide | ＜9223.37=0，＞9223.37=1 |
| LPC (12:0/0:0) | ＜160769.12=0，＞160769.12=1 |
| PA (20:4/2:0) | ＜37147.65=0，＞37147.65=1 |
| Oleic acid (d5) | ＜2266.3=0，＞2266.3=1 |
| N-Acetyl-a-neuraminic acid | ＜133.9=0，＞133.9=1 |
| Pyrimidine | ＜438.69=0，＞438.69=1 |
| Choline | ＜2137.94=0，＞2137.94=1 |
| Sex | Female=0，Male=1 |
| Age | ＜20years=1，20~40years=2，40~60years=3, ＞60years=4 |
| Smoking | No=0，Yes=1 |
| WBC | 4-10*109/L=0，＜4*109/L or ＞10*109/L=1 |
| CRP | ≤5mg/L=0，＞5mg/L=1 |
| PCT | ≤0.05ng/mL=0，＞0.05ng/mL=1 |
| ESR | Male：0~15mm/h=0，＞15mm/h=1 Female：0~20mm/h=0，＞20mm/h=1 |

WBC, White blood cell count; CRP, C-reactive protein; PCT, procalcitonin, ESR, erythrocyte sedimentation rate.
